# Supplementary material for: Comparing Humoral and Cellular Adaptive Immunity during Convalescent Phase of COVID-19 in Hemodialysis Patients and Kidney Transplant Recipients
Source: MDPI journal article supplement (doi:10.3390/jcm10214833), 2021-10-21
Supplement: s1 [file s1]

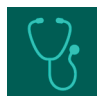

**Table S1.** Standard laboratory parameters and inflammatory markers in hemodialysis (HD) and transplant (KTR) patients.

| Parameter                         | HD                                     | KTR                              | <i>p</i> -Value |
|-----------------------------------|----------------------------------------|----------------------------------|-----------------|
| NT-pro-BNP (ng/L)                 | 27866.1 ± 28524.5<br>14975, 3120–70000 | 447.4 ± 937.1<br>315, 133–475    | < 0.001         |
| BNP (ng/L)                        | 1716.7 ± 3006.5<br>316, 112–2573       | 78.2 ± 118.6<br>61, 29–98        | < 0.001         |
| Albumin (g/dL)                    | 3.60 ± 0.63<br>3.8, 3.3–4.0            | 4.52 ± 1.59<br>4.3, 4.1–4.6      | < 0.001         |
| CRP (mg/L)                        | 17.17 ± 32.90<br>4.4, 2.6–13.7         | 2.91 ± 5.02<br>1.3, 0.6–3.2      | < 0.001         |
| Platelets (10 <sup>3</sup> /μL)   | 178.2 ± 60.4<br>184, 127–217           | 225.7 ± 55.4<br>229, 189–267     | 0.001           |
| Leucocytes (10 <sup>3</sup> /μL)  | 7.15 ± 1.60<br>7.2, 5.8–8.2            | 8.20 ± 1.98<br>8.1, 6.6–9.7      | 0.025           |
| Neutrophils (10 <sup>3</sup> /μL) | 5.95 ± 6.25<br>4.7, 3.8–5.6            | 4.45 ± 1.44<br>4.4, 3.7–5.4      | 0.510           |
| Lymphocytes (10 <sup>3</sup> /μL) | 1.35 ± 0.52<br>1.4, 1.0–1.5            | 2.62 ± 0.76<br>2.7, 2.0–3.1      | < 0.001         |
| Monocytes (10 <sup>3</sup> /μL)   | 0.62 ± 0.20<br>0.7, 0.5–0.7            | 0.79 ± 0.21<br>0.8, 0.7–1.0      | 0.002           |
| NLR                               | 4.67 ± 3.53<br>3.9, 2.2–5.9            | 1.85 ± 0.65<br>1.7, 1.3–2.2      | < 0.001         |
| dNLR                              | 1.092 ± 1.451<br>0.84, 0.79–0.87       | 0.815 ± 0.052<br>0.82, 0.79–0.84 | 0.267           |
| PLR                               | 149.1 ± 71.7<br>128, 102–186           | 91.7 ± 30.3<br>88, 73–104        | < 0.001         |
| MLR                               | 0.505 ± 0.201<br>0.49, 0.38–0.61       | 0.322 ± 0.123<br>0.31, 0.25–0.39 | < 0.001         |

Descriptive statistics: mean ± SD, median, IQR

**Table S2.** Standard laboratory parameters and inflammatory markers in hemodialysis (HD) and transplant (KTR) patients in relation to SARS-CoV-2 exposure.

| Parameter                         | HD                |                   |          | KTR             |                 |          |
|-----------------------------------|-------------------|-------------------|----------|-----------------|-----------------|----------|
|                                   | Convalescent      | Reference         | <i>p</i> | Convalescent    | Reference       | <i>p</i> |
| NT-pro-BNP (ng/L)                 | 38885.3 ± 31451.6 | 16847 ± 21267.8   | 0.104    | 589.2 ± 1358.2  | 325.1 ± 218.1   | 0.917    |
|                                   | 40662, 7865–70000 | 11671, 1603–24264 |          | 305, 136–550    | 325, 133–455    |          |
| BNP (ng/L)                        | 2740.6 ± 3885.1   | 599.6 ± 807.7     | 0.310    | 96.4 ± 169.6    | 62.5 ± 37.7     | 0.931    |
|                                   | 738, 180–3906     | 258, 64–730       |          | 51, 29–100      | 69, 23–98       |          |
| Albumin (g/dL)                    | 3.33 ± 0.7        | 3.87 ± 0.42       | 0.013    | 4.32 ± 0.31     | 4.69 ± 2.16     | 0.937    |
|                                   | 3.4, 3.1–3.9      | 4.0, 3.7–4.2      |          | 4.3, 4.2–4.6    | 4.4, 4.1–4.6    |          |
| CRP (mg/L)                        | 28.71 ± 42.99     | 4.67 ± 4.13       | 0.041    | 3.25 ± 6.48     | 2.61 ± 3.4      | 0.477    |
|                                   | 6.5, 3.6–17.7     | 3.3, 1.9–4.6      |          | 1.2, 0.5–2.0    | 2.0, 0.6–3.2    |          |
| Platelets (10 <sup>3</sup> /μL)   | 195.6 ± 69.2      | 159.3 ± 44.7      | 0.242    | 231.5 ± 60.3    | 220.8 ± 51.4    | 0.390    |
|                                   | 193, 127–222      | 143, 131–194      |          | 231, 189–269    | 217, 190–239    |          |
| Leucocytes (10 <sup>3</sup> /μL)  | 7.27 ± 1.83       | 7.01 ± 1.37       | 0.807    | 8.12 ± 2.09     | 8.27 ± 1.91     | 0.924    |
|                                   | 6.9, 5.8–8.5      | 7.3, 6.0–8.0      |          | 8.1, 6.7–9.5    | 8.1, 6.6–9.9    |          |
| Neutrophils (10 <sup>3</sup> /μL) | 4.82 ± 1.93       | 7.18 ± 8.84       | 0.786    | 4.45 ± 1.43     | 4.7 ± 1.46      | 0.869    |
|                                   | 4.2, 3.6–6.4      | 4.9, 3.9–5.6      |          | 4.4, 3.2–5.2    | 4.2, 3.8–5.6    |          |
| Lymphocytes (10 <sup>3</sup> /μL) | 1.191 ± 0.484     | 1.513 ± 0.522     | 0.109    | 2.687 ± 0.817   | 2.568 ± 0.721   | 0.538    |
|                                   | 1.12, 0.93–1.42   | 1.48, 1.21–1.67   |          | 2.66, 2.53–3.09 | 2.47, 1.95–3.07 |          |
| Monocytes (10 <sup>3</sup> /μL)   | 0.652 ± 0.196     | 0.592 ± 0.215     | 0.355    | 0.788 ± 0.259   | 0.784 ± 0.162   | 0.493    |
|                                   | 0.69, 0.56–0.74   | 0.58, 0.44–0.72   |          | 0.83, 0.70–0.97 | 0.76, 0.66–0.88 |          |
| NLR                               | 4.528 ± 2.053     | 4.823 ± 4.756     | 0.463    | 1.749 ± 0.607   | 1.933 ± 0.684   | 0.286    |
|                                   | 4.16, 2.22–5.89   | 2.94, 2.33–5.83   |          | 1.69, 1.25–2.10 | 1.89, 1.38–2.31 |          |
| dNLR                              | 0.782 ± 0.151     | 1.429 ± 2.080     | 0.313    | 0.814 ± 0.06    | 0.816 ± 0.046   | 0.577    |
|                                   | 0.82, 0.79–0.86   | 0.86, 0.80–0.90   |          | 0.81, 0.79–0.84 | 0.82, 0.80–0.84 |          |
| PLR                               | 181 ± 75.2        | 114.5 ± 50.3      | 0.010    | 92.4 ± 31.5     | 91.1 ± 29.8     | 0.748    |
|                                   | 156, 128–208      | 104, 89–126       |          | 88, 73–108      | 85, 73–100      |          |
| MLR                               | 0.592 ± 0.206     | 0.412 ± 0.154     | 0.012    | 0.32 ± 0.154    | 0.323 ± 0.092   | 0.526    |
|                                   | 0.50, 0.49–0.63   | 0.39, 0.28–0.52   |          | 0.28, 0.26–0.35 | 0.32, 0.25–0.39 |          |

Descriptive statistics: mean ± SD, median, IQR

**Table S3.** Phenotypes of peripheral blood T lymphocytes in hemodialysis (HD) and transplant (KTR) patients.

| Cell population             | HD                                   | KTR                                   | <i>p</i> |
|-----------------------------|--------------------------------------|---------------------------------------|----------|
| T cells/ $\mu$ L            | 1071.3 $\pm$ 640.7<br>1003, 726–1116 | 2112.0 $\pm$ 697.3<br>2213, 1565–2643 | < 0.001  |
| T %lymphocytes              | 77.17 $\pm$ 8.05<br>79.2, 69.2–82.6  | 79.63 $\pm$ 7.81<br>80.3, 76.0–86.0   | 0.178    |
| CD4+ T cells / $\mu$ L      | 627.8 $\pm$ 292.9<br>586, 461–771    | 1263.9 $\pm$ 528.5<br>1186, 811–1725  | < 0.001  |
| CD8+ T cells / $\mu$ L      | 375.4 $\pm$ 302.3<br>272, 172–420    | 738.6 $\pm$ 328.3<br>721, 499–908     | < 0.001  |
| CD4+CD8+ T cells / $\mu$ L  | 16.10 $\pm$ 14.99<br>9.6, 7.2–18.4   | 47.51 $\pm$ 125.10<br>20.4, 9.3–38.1  | 0.018    |
| CD4+ / CD8+                 | 2.32 $\pm$ 1.64<br>1.9, 1.3–2.8      | 2.11 $\pm$ 1.56<br>1.8, 1.2–2.4       | 0.651    |
| CD4+ %T                     | 60.76 $\pm$ 13.76<br>60.1, 55.2–70.8 | 59.16 $\pm$ 12.24<br>60.5, 51.6–67.6  | 0.702    |
| CD8+ %T                     | 34.00 $\pm$ 12.98<br>33.9, 24.8–40.4 | 35.64 $\pm$ 12.49<br>34.0, 28.0–43.3  | 0.664    |
| CD4+CD8+ %T                 | 1.554 $\pm$ 1.355<br>1.06, 0.77–1.72 | 2.010 $\pm$ 4.604<br>0.91, 0.47–1.98  | 0.233    |
| Regulatory T cells/ $\mu$ L | 15.65 $\pm$ 10.23<br>13.8, 8.7–20.3  | 17.78 $\pm$ 10.30<br>15.7, 10.1–23.7  | 0.285    |
| Th1 cells/ $\mu$ L          | 113.3 $\pm$ 65.5<br>108, 69–135      | 161.8 $\pm$ 108.0<br>141, 97–196      | 0.057    |
| Th2 cells/ $\mu$ L          | 3.76 $\pm$ 2.74<br>3.5, 1.6–4.8      | 2.48 $\pm$ 1.48<br>2.2, 1.3–3.3       | 0.034    |
| Th17 cells/ $\mu$ L         | 6.33 $\pm$ 4.88<br>4.1, 2.9–10.9     | 5.84 $\pm$ 3.04<br>5.3, 3.6–7.6       | 0.677    |
| Regulatory T %CD4+ T        | 2.476 $\pm$ 0.828<br>2.39, 1.75–3.05 | 1.469 $\pm$ 0.714<br>1.46, 0.91–1.87  | <0.001   |
| Th1 % CD4+ T                | 18.92 $\pm$ 7.80<br>18.3, 12.6–22.3  | 13.66 $\pm$ 8.09<br>11.7, 8.1–17.9    | <0.003   |
| Th2 % CD4+ T                | 0.612 $\pm$ 0.400<br>0.47, 0.41–0.72 | 0.211 $\pm$ 0.124<br>0.18, 0.13–0.25  | <0.001   |
| Th17 % CD4+ T               | 1.016 $\pm$ 0.578<br>0.89, 0.56–1.34 | 0.506 $\pm$ 0.298<br>0.43, 0.28–0.60  | <0.001   |

Descriptive statistics: mean  $\pm$  SD, median, IQR

**Table S4.** Phenotypes of peripheral blood B lymphocytes and NK cells in hemodialysis (HD) and transplant (KTR) patients.

| Cell Population               | HD                                   | KTR                                  | <i>p</i> |
|-------------------------------|--------------------------------------|--------------------------------------|----------|
| B cells/ $\mu$ L              | 120.4 $\pm$ 92.7<br>98, 62–147       | 200.0 $\pm$ 172.6<br>131, 95–287     | 0.021    |
| B %lymphocytes                | 9.12 $\pm$ 5.66<br>9.5, 4.4–11.9     | 7.35 $\pm$ 4.82<br>6, 3.6–9          | 0.150    |
| Plasmablasts cells/ $\mu$ L   | 2.275 $\pm$ 2.795<br>0.97, 0.61–2.79 | 0.809 $\pm$ 1.172<br>0.36, 0.12–1.19 | < 0.001  |
| IgD- memory B cells/ $\mu$ L  | 16.34 $\pm$ 13.14<br>10.4, 8.3–23.4  | 48.85 $\pm$ 71.87<br>27.6, 15.1–51.5 | < 0.001  |
| IgD+ memory B cells/ $\mu$ L  | 13.14 $\pm$ 30.91<br>4.5, 3.0–8.5    | 30.69 $\pm$ 34.30<br>17.2, 9.0–45.6  | < 0.001  |
| Naïve B cells/ $\mu$ L        | 80.5 $\pm$ 69.4<br>65, 29–114        | 110.5 $\pm$ 104.7<br>72, 49–142      | 0.242    |
| Transitional B cells/ $\mu$ L | 3.489 $\pm$ 4.743<br>1.63, 0.49–4.31 | 1.489 $\pm$ 1.710<br>0.76, 0.33–2.14 | 0.122    |
| Plasmablasts %B               | 3.663 $\pm$ 5.429<br>1.35, 0.56–2.93 | 0.594 $\pm$ 0.845<br>0.23, 0.08–0.81 | <0.001   |
| IgD- memory B %B              | 16.43 $\pm$ 10.16<br>15.1, 8.7–23.2  | 23.37 $\pm$ 15.03<br>19.4, 12.7–31.1 | 0.042    |
| IgD+ memory B %B              | 9.46 $\pm$ 9.00<br>5.8, 2.9–15.5     | 15.2 $\pm$ 10.29<br>12.5, 6.5–23.2   | 0.004    |
| Naïve B %B                    | 62.21 $\pm$ 19.94<br>67.9, 48.1–78.1 | 56.04 $\pm$ 21.07<br>56.2, 39.1–73.4 | 0.242    |
| Transitional B %B             | 2.825 $\pm$ 3.796<br>1.53, 0.60–3.71 | 0.914 $\pm$ 1.116<br>0.65, 0.24–0.98 | 0.002    |
| NK cells/ $\mu$ L             | 156.1 $\pm$ 84.3<br>147, 103–175     | 321.5 $\pm$ 224.9<br>256, 148–448    | < 0.001  |
| NK %lymphocytes               | 13.14 $\pm$ 7.89<br>10.5, 8.0–16.7   | 12.5 $\pm$ 8.12<br>10.4, 7.0–17.4    | 0.592    |
| NKT cells/ $\mu$ L            | 70.0 $\pm$ 87.9<br>42, 23–84         | 176.8 $\pm$ 177.9<br>121, 65–202     | < 0.001  |
| NKT %lymphocytes              | 5.016 $\pm$ 3.814<br>3.38, 2.66–7.14 | 6.381 $\pm$ 5.483<br>4.39, 2.31–7.38 | 0.484    |

Descriptive statistics: mean  $\pm$  SD, median, IQR

**Table S5.** Phenotypes of peripheral blood T lymphocytes in hemodialysis (HD) and transplant (KTR) patients in relation to SARS-CoV-2 exposure.

| Cell Population                    | HD                                    |                                         |          | KTR                                       |                                           |          |
|------------------------------------|---------------------------------------|-----------------------------------------|----------|-------------------------------------------|-------------------------------------------|----------|
|                                    | Convalescent                          | Unexposed                               | <i>p</i> | Convalescent                              | Unexposed                                 | <i>p</i> |
| T cells/ $\mu$ L                   | 878.4 $\pm$ 412.2<br>884, 538–1064    | 1296.5 $\pm$ 793.5<br>1069, 928–1329    | 0.076    | 2190.6 $\pm$ 684<br>2283, 1721–2635       | 2044.3 $\pm$ 713.5<br>1696, 1438–2643     | 0.476    |
| T %lymphocytes                     | 77.26 $\pm$ 7.11<br>79.2, 74.1–82.6   | 77.07 $\pm$ 9.36<br>79.0, 69.1–83.2     | 0.979    | 80.71 $\pm$ 7.67<br>80.8, 77.9–86.9       | 78.7 $\pm$ 7.94<br>77.7, 73.7–85.4        | 0.176    |
| CD4+ T cells / $\mu$ L             | 529.0 $\pm$ 247.5<br>583, 342–617     | 743.1 $\pm$ 309.3<br>764, 539–884       | 0.105    | 1308.5 $\pm$ 569.8<br>1343, 803–1711      | 1225.5 $\pm$ 497.1<br>1050, 824–1725      | 0.822    |
| CD4+ %T                            | 60.92 $\pm$ 15.02<br>60.1, 55.2–75.7  | 60.57 $\pm$ 12.78<br>60.7, 54.1–70      | 0.898    | 58.75 $\pm$ 13.16<br>59.0, 45.9–68.4      | 59.51 $\pm$ 11.61<br>61.3, 56.4–67.3      | 0.788    |
| CD8+ T cells / $\mu$ L             | 314.1 $\pm$ 236.4<br>179, 164–400     | 446.9 $\pm$ 362.4<br>365, 254–458       | 0.129    | 758.1 $\pm$ 351.6<br>722, 590–931         | 721.7 $\pm$ 312.1<br>720, 497–899         | 0.579    |
| CD8+ %T                            | 34.82 $\pm$ 14.7<br>35.1, 21.7–42.4   | 33.03 $\pm$ 11.2<br>33.9, 25.7–40.0     | 0.898    | 35.58 $\pm$ 14.17<br>32.7, 27.4–49.7      | 35.69 $\pm$ 11.11<br>34.3, 29.5–38.4      | 0.896    |
| CD4+CD8+ T cells / $\mu$ L         | 8.26 $\pm$ 4.24<br>7.4, 6.5–9.6       | 25.24 $\pm$ 17.84<br>19.2, 9.9–35.8     | <0.001   | 69.26 $\pm$ 180.52<br>21.5, 10.2–40.6     | 28.76 $\pm$ 30.1<br>20.1, 8.8–33.7        | 0.567    |
| CD4+CD8+ %T                        | 0.99 $\pm$ 0.40<br>0.9, 0.7–1.1       | 2.22 $\pm$ 1.76<br>1.6, 1.0–2.7         | 0.022    | 2.77 $\pm$ 6.63<br>0.9, 0.5–1.7           | 1.35 $\pm$ 1.2<br>0.9, 0.5–2.0            | 0.671    |
| CD4+ / CD8+                        | 2.35 $\pm$ 1.68<br>1.8, 1.3–3.5       | 2.28 $\pm$ 1.66<br>1.9, 1.3–2.7         | 0.979    | 2.33 $\pm$ 2.06<br>1.8, 0.9–2.5           | 1.92 $\pm$ 0.93<br>1.8, 1.5–2.3           | 0.979    |
| CD4+ CD28- CD57- T cells / $\mu$ L | 12.44 $\pm$ 15.74<br>7.8, 1.2–16.6    | 5.47 $\pm$ 4.86<br>3.7, 2–8.4           | 0.527    | 12.04 $\pm$ 16.57<br>4.3, 0.5–17.7        | 12.48 $\pm$ 28.04<br>3.5, 0.8–10.9        | 0.767    |
| CD4+ CD28- CD57- %T                | 3.56 $\pm$ 6.43<br>1.6, 0.2–3.3       | 0.93 $\pm$ 1.08<br>0.5, 0.3–1.1         | 0.231    | 0.96 $\pm$ 1.39<br>0.4, 0.1–1.2           | 1.1 $\pm$ 2.22<br>0.3, 0.1–1              | 0.905    |
| CD8+ CD28- CD57- T cells / $\mu$ L | 19.13 $\pm$ 20.7<br>15.4, 3.5–28.4    | 36.13 $\pm$ 33.75<br>33.3, 5–58.9       | 0.176    | 62.65 $\pm$ 108.59<br>25.5, 4.8–79.2      | 45.28 $\pm$ 66.88<br>21.1, 2.4–48.7       | 0.618    |
| CD8+ CD28- CD57- %T                | 5.02 $\pm$ 5.27<br>3.9, 0.6–6.5       | 4.83 $\pm$ 3.77<br>5.4, 0.9–7.6         | 0.781    | 4.92 $\pm$ 6.95<br>2.1, 0.4–6.5           | 4.24 $\pm$ 6.86<br>1.4, 0.3–6.6           | 0.606    |
| CD4+ CD28- CD57+ T cells / $\mu$ L | 34.25 $\pm$ 35.02<br>23.3, 12.8–51.2  | 70.43 $\pm$ 84.17<br>32.1, 13.2–105.8   | 0.347    | 156.67 $\pm$ 164.68<br>95.0, 33.8–223.8   | 106.53 $\pm$ 113.14<br>76.5, 31.8–137.1   | 0.309    |
| CD4+ CD28- CD57+ %T                | 11.26 $\pm$ 7.97<br>8.4, 4.9–14.7     | 14.79 $\pm$ 11.61<br>11.6, 7.7–20.7     | 0.560    | 22.66 $\pm$ 35.31<br>15.2, 5.5–22.6       | 12.84 $\pm$ 8.39<br>10.7, 6.6–16.6        | 0.247    |
| CD8+ CD28- CD57+ T cells / $\mu$ L | 138.41 $\pm$ 161.63<br>61.9, 39.9–128 | 135.17 $\pm$ 177.43<br>60.6, 26.1–160.7 | 0.781    | 239.26 $\pm$ 166.57<br>196.9, 107.8–372.9 | 236.68 $\pm$ 176.45<br>169.0, 115.3–369.7 | 0.877    |
| CD8+ CD28- CD57+ %T                | 37.15 $\pm$ 21.71 33.6,<br>15.1–56.8  | 25.65 $\pm$ 17.97 22.7,<br>15.4–36.6    | 0.231    | 33.33 $\pm$ 25.95<br>28.7, 19.1–37.8      | 30.13 $\pm$ 12.86<br>29.8, 20.4–38.8      | 0.918    |
| Regulatory T cells/ $\mu$ L        | 12.75 $\pm$ 6.45<br>13.8, 7.6–16.7    | 19.03 $\pm$ 12.86<br>15.4, 9.6–24.2     | 0.227    | 19.42 $\pm$ 12.18<br>15.0, 11.7–25.8      | 16.36 $\pm$ 8.32<br>16.3, 9.8–19.9        | 0.488    |
| Regulatory T %CD4+ T               | 2.452 $\pm$ 0.688<br>2.39, 1.97–2.86  | 2.504 $\pm$ 0.999<br>2.30, 1.63–3.55    | 0.898    | 1.568 $\pm$ 0.833<br>1.49, 0.91–1.85      | 1.383 $\pm$ 0.595<br>1.34, 0.91–1.87      | 0.566    |
| Th1 cells/ $\mu$ L                 | 90.5 $\pm$ 45.6<br>76, 57–122         | 140 $\pm$ 76.6<br>126, 98–166           | 0.076    | 171 $\pm$ 114.8<br>142, 99–204            | 154.0 $\pm$ 103.1<br>140, 97–176          | 0.715    |
| Th1 % CD4+ T                       | 18.92 $\pm$ 9.14<br>17.5, 12.4–30.3   | 18.91 $\pm$ 6.28<br>18.3, 14.6–21.5     | 0.857    | 14.07 $\pm$ 7.61<br>14.3, 7.6–17.9        | 13.3 $\pm$ 8.59<br>11.0, 8.3–15.5         | 0.633    |
| Th2 cells/ $\mu$ L                 | 3.79 $\pm$ 3.27<br>3.5, 1.4–4.8       | 3.72 $\pm$ 2.10<br>3.6, 2.2–4.8         | 0.797    | 2.57 $\pm$ 1.49<br>2.2, 1.7–3.1           | 2.4 $\pm$ 1.5<br>2.1, 1.2–3.3             | 0.555    |
| Th2 % CD4+ T                       | 0.72 $\pm$ 0.509<br>0.58, 0.4–0.97    | 0.486 $\pm$ 0.158<br>0.47, 0.43–0.6     | 0.471    | 0.216 $\pm$ 0.113<br>0.19, 0.14–0.26      | 0.207 $\pm$ 0.135<br>0.17, 0.12–0.24      | 0.573    |
| Th17 cells/ $\mu$ L                | 4.67 $\pm$ 3.35<br>3.8, 2.8–5.2       | 8.27 $\pm$ 5.76<br>5.4, 3.6–12.8        | 0.080    | 5.49 $\pm$ 2.52<br>5.3, 3.5–7.2           | 6.14 $\pm$ 3.44<br>5.4, 3.8–8.3           | 0.450    |
| Th17 % CD4+ T                      | 0.922 $\pm$ 0.526<br>0.82, 0.56–1.18  | 1.126 $\pm$ 0.639<br>1.26, 0.53–1.55    | 0.456    | 0.488 $\pm$ 0.307<br>0.41, 0.28–0.59      | 0.522 $\pm$ 0.295<br>0.49, 0.36–0.60      | 0.646    |

Descriptive statistics: mean  $\pm$  SD, median, IQR

**Table S6.** Phenotypes of peripheral blood B lymphocytes and NK cells in hemodialysis (HD) and transplant (KTR) patients in relation to SARS-CoV-2 exposure.

| Cell Population               | HD                |                   |          | KTR                |                     |          |
|-------------------------------|-------------------|-------------------|----------|--------------------|---------------------|----------|
|                               | Convalescent      | Unexposed         | <i>p</i> | Convalescent       | Unexposed           | <i>p</i> |
| B cells/ $\mu$ L              | 103.2 $\pm$ 94.8  | 140.4 $\pm$ 89.9  | 0.172    | 215.0 $\pm$ 191.6  | 187.0 $\pm$ 156.6   | 0.499    |
|                               | 85, 62–108        | 135, 68–203       |          | 166, 101–286       | 124, 86–287         |          |
| B %lymphocytes                | 8.89 $\pm$ 5.63   | 9.39 $\pm$ 5.93   | 0.487    | 7.41 $\pm$ 4.13    | 7.30 $\pm$ 5.41     | 0.445    |
|                               | 7.7, 5.6–10.4     | 11.2, 3.6–12.5    |          | 7.3, 3.8–9.0       | 5.0, 3.6–9.0        |          |
| Plasmablasts cells/ $\mu$ L   | 2.804 $\pm$ 3.336 | 1.658 $\pm$ 1.956 | 0.396    | 0.882 $\pm$ 1.243  | 0.746 $\pm$ 1.126   | 0.526    |
|                               | 1.34, 0.73–3.78   | 0.92, 0.52–1.62   |          | 0.42, 0.14–0.81    | 0.22, 0.12–1.19     |          |
| Plasmablasts %B               | 4.32 $\pm$ 4.84   | 2.9 $\pm$ 6.17    | 0.247    | 0.61 $\pm$ 0.82    | 0.58 $\pm$ 0.88     | 0.952    |
|                               | 1.6, 0.6–9.4      | 1.0, 0.4–2.2      |          | 0.3, 0.1–0.8       | 0.2, 0.1–0.7        |          |
| IgD- memory B cells/ $\mu$ L  | 11.9 $\pm$ 8.25   | 21.5 $\pm$ 16.05  | 0.105    | 56.74 $\pm$ 91.82  | 42.05 $\pm$ 49.46   | 0.567    |
|                               | 8.9, 7.2–16.8     | 15.1, 8.9–33.3    |          | 30.5, 15.1–57.0    | 25.8, 16.3–42.3     |          |
| IgD- memory B %B              | 14.18 $\pm$ 8.31  | 19.06 $\pm$ 11.79 | 0.292    | 22.76 $\pm$ 12.39  | 23.88 $\pm$ 17.20   | 0.822    |
|                               | 10.8, 7.9–18.3    | 15.9, 11.0–25.0   |          | 18.9, 14.4–30.2    | 19.8, 10.6–31.5     |          |
| IgD+ memory B cells/ $\mu$ L  | 16.69 $\pm$ 41.17 | 9.00 $\pm$ 11.56  | 0.857    | 33.88 $\pm$ 37.06  | 27.94 $\pm$ 32.15   | 0.652    |
|                               | 4.6, 2.5–8.5      | 4.3, 3.1–8.1      |          | 19.8, 7.4–58.9     | 15.0, 9.5–33.7      |          |
| IgD+ memory B %B              | 10.64 $\pm$ 10.69 | 8.09 $\pm$ 6.71   | 0.425    | 15.51 $\pm$ 10.35  | 14.94 $\pm$ 10.42   | 0.979    |
|                               | 5.8, 4.1–15.5     | 4.9, 2.3–14.5     |          | 13.6, 6.1–24.5     | 10.6, 7.5–20.5      |          |
| Naïve B cells/ $\mu$ L        | 62.76 $\pm$ 52.19 | 101.3 $\pm$ 82.82 | 0.172    | 113.12 $\pm$ 97.42 | 108.29 $\pm$ 112.26 | 0.415    |
|                               | 53, 28.6–76       | 96.2, 31.9–138    |          | 79.1, 50.6–152.0   | 65.8, 44.1–87.8     |          |
| Naïve B %B                    | 61.39 $\pm$ 18.73 | 63.18 $\pm$ 22.07 | 0.857    | 55.97 $\pm$ 21.23  | 56.11 $\pm$ 21.31   | 0.890    |
|                               | 59.8, 49.2–80.7   | 69.1, 47.0–76.9   |          | 56.0, 41.0–70.1    | 56.4, 39.1–74.2     |          |
| Transitional B cells/ $\mu$ L | 2.923 $\pm$ 4.451 | 4.143 $\pm$ 5.181 | 0.738    | 1.754 $\pm$ 1.658  | 1.261 $\pm$ 1.749   | 0.176    |
|                               | 1.63, 0.49–2.76   | 2.13, 0.45–6.47   |          | 1.10, 0.44–2.79    | 0.55, 0.32–1.23     |          |
| Transitional B %B             | 3.112 $\pm$ 4.497 | 2.489 $\pm$ 2.935 | 0.520    | 1.104 $\pm$ 1.317  | 0.750 $\pm$ 0.902   | 0.274    |
|                               | 1.70, 1.20–3.32   | 1.03, 0.58–4.21   |          | 0.70, 0.58–1.01    | 0.43, 0.24–0.87     |          |
| NK cells/ $\mu$ L             | 133.5 $\pm$ 63.2  | 182.4 $\pm$ 100.2 | 0.269    | 310.9 $\pm$ 265.9  | 330.7 $\pm$ 187.0   | 0.367    |
|                               | 142, 82–162       | 165, 114–185      |          | 204, 108–434       | 313, 169–448        |          |
| NK %lymphocytes               | 13.23 $\pm$ 7.05  | 13.03 $\pm$ 9.1   | 0.777    | 11.41 $\pm$ 8.25   | 13.44 $\pm$ 8.04    | 0.362    |
|                               | 12.4, 8.0–16.7    | 9.9, 8.0–15.1     |          | 10.4, 3.2–15.2     | 10.5, 7.1–18.5      |          |
| NKT cells/ $\mu$ L            | 50.8 $\pm$ 35.5   | 92.4 $\pm$ 122.7  | 0.589    | 158.4 $\pm$ 162.9  | 192.7 $\pm$ 191.2   | 0.521    |
|                               | 36, 23–78         | 49, 23–109        |          | 117, 58–185        | 124, 69–202         |          |
| NKT %lymphocytes              | 5.06 $\pm$ 3.74   | 4.97 $\pm$ 4.06   | 0.817    | 5.69 $\pm$ 5.46    | 6.98 $\pm$ 5.53     | 0.252    |
|                               | 3.2, 2.7–7.0      | 3.4, 2.0–7.9      |          | 4.0, 2.1–7.3       | 5.4, 2.6–7.4        |          |

Descriptive statistics: mean  $\pm$  SD, median, IQR
